# Supplementary material for: Assembly of heteropoly acid into localized porous structures for in situ preparation of silver and polypyrrole nanoparticles
Source: Royal Society of Chemistry journal article supplement (doi:10.1039/c8ra07939k), 2018-01-01
Supplement: c8ra07939k1.pdf [file c8ra07939k1.pdf]

## Supplementary Information

### Assembly of Heteropoly Acid into Localized Porous Structures for In-situ Preparation of Silver and Polypyrrole Nanoparticles

Jing Liang<sup>\*a</sup>, Lei Yu<sup>b</sup>, Jiangyong Zhang,<sup>a</sup> Shixiong Zhao<sup>c</sup>, Jiejing Zhang<sup>a</sup>, Jianfeng Zhang<sup>a</sup>

<sup>a</sup> College of life science, Jilin Agricultural University, Changchun 130118, China

<sup>b</sup> Jilin Radion and TV University, Changchun 130022, China

<sup>c</sup> Dalian Institute of Chemical Physics, Chinese Academy of Science, 116023, China

E-mail: liangjing@jlau.edu.cn

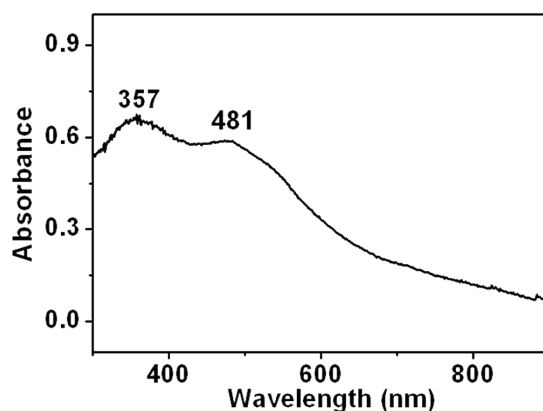

**Fig. S1** UV-Vis spectrum of  $\text{HPMo}_{12}/\text{PMMA}$  film on quartz substrate after the in situ polymerization (PPy spheres) prepared by dipping the hybrid porous film in 0.1 M of pyrrole aqueous solution under pH 4 for 40 min.

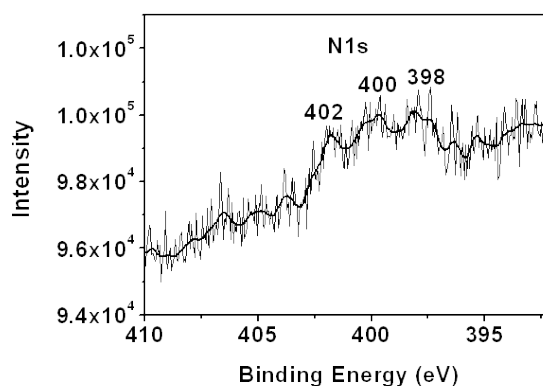

**Fig. S2** XPS spectrum of N element on the  $\text{HPMo}_{12}/\text{PMMA}$  film after encountering 40 min of its dipping in pH 4 of pyrrole aqueous solution.

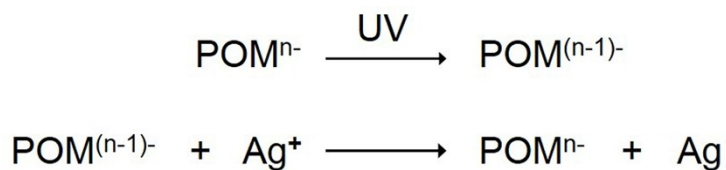

**Eq. S1** The chemical process of reduction of silver ions by heteropoly acids.

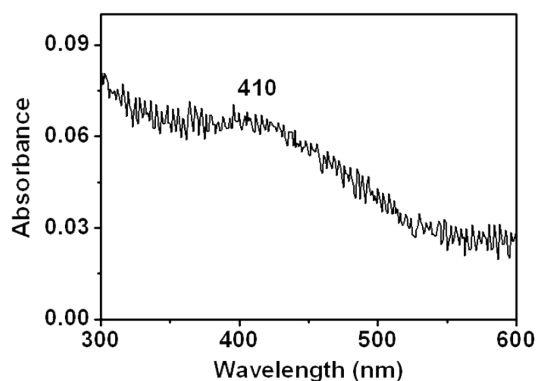

**Fig. S3** UV-vis spectrum of  $\text{HPW}_{12}/\text{PMMA}$  film on quartz substrate containing Ag nanoparticles prepared with the irradiation of UV light for 15 min and then dipped in silver nitrate aqueous solution for 30 min.

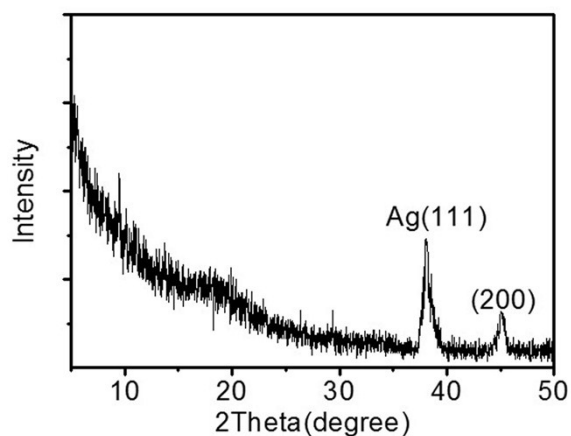

**Fig. S4** XRD spectrum of Ag nanoparticles on the  $\text{HPW}_{12}/\text{PMMA}$  film after 15 min of UV light irradiation for the film and then 30 min of dipping in silver nitrate aqueous solution.

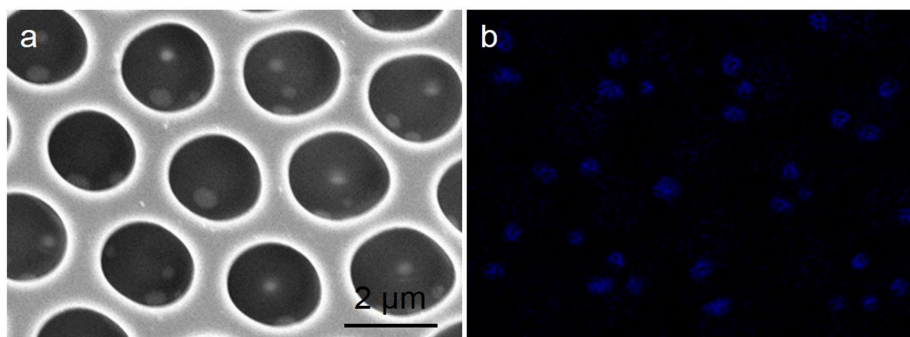

**Fig. S5** (a) SEM image and (b) EDX analysis of PMMA porous films containing silver nanoparticles, respectively.

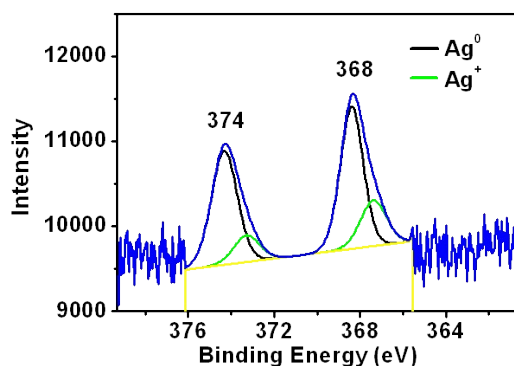

**Fig. S6** XPS spectrum of Ag element on the HPW<sub>12</sub>/PMMA film after 15 min of UV light irradiation for the film and then 30 min of dipping in silver nitrate aqueous solution.

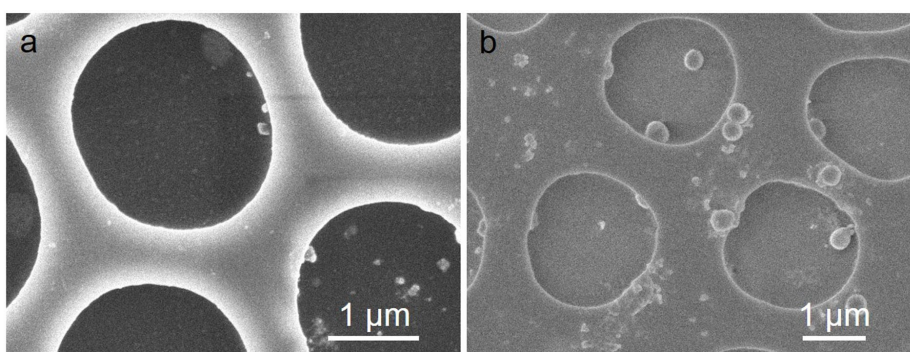

**Fig. S7** SEM images of (a) silver and (b) polypyrrole nanoparticles contained porous film with sonication and washing treatments, respectively.
